# Supplementary material
Source: ML conference proceedings conference paper supplement (https://openreview.net/forum?id=Ogga20D2HO-)
Supplement: supplementary_material [file attachment]

# FEDMIX: APPROXIMATION OF MIXUP UNDER MEAN AUGMENTED FEDERATED LEARNING

**Anonymous authors**

Paper under double-blind review

## ABSTRACT

Federated learning (FL) allows edge devices to collectively learn a model without directly sharing data within each device, thus preserving privacy and eliminating the need to store data globally. While there are promising results under the assumption of independent and identically distributed (iid) local data, current state-of-the-art algorithms suffer from performance degradation as the heterogeneity of local data across clients increases. To resolve this issue, we propose a *simple* framework, *Mean Augmented Federated Learning (MAFL)*, where clients send and receive *averaged* local data, subject to the privacy requirements of target applications. Under our framework, we propose a new augmentation algorithm, named *FedMix*, which is inspired by a phenomenal yet simple data augmentation method, Mixup, but does not require local raw data to be directly shared among devices. Our method shows greatly improved performance in the standard benchmark datasets of FL, under highly non-iid federated settings, compared to conventional algorithms.

## 1 INTRODUCTION

As we enter the era of edge computing, more data is being collected directly from edge devices such as mobile phones, vehicles, facilities, and so on. By decoupling the ability to learn from the delicate process of merging sensitive personal data, Federated learning (FL) proposes a paradigm that allows a global neural network to learn to be trained collaboratively from individual clients without directly accessing the local data of other clients, thus preserving the privacy of each client (Konečný et al., 2016; McMahan et al., 2017). Federated learning lets clients do most of the computation using its local data, with the global server only aggregating and updating the model parameters based on those sent by clients.

One of the standard and most widely used algorithm for federated learning is FedAvg (McMahan et al., 2017), which simply averages model parameters trained by each client in an element-wise manner, weighted proportionately by the size of data used by clients. FedProx (Li et al., 2018) is a variant of FedAvg that adds a proximal term to the objective function of clients, improving statistical stability of the training process. While several other methods have been proposed until recently (Mohri et al., 2019; Yurochkin et al., 2019; Wang et al., 2020), they all build on the idea that updated model parameters from clients are averaged in certain manners.

Although conceptually it provides an ideal learning environment for edge devices, the federated learning still has some practical challenges that prevent the widespread application of it. Among such challenges, the one that we are interested in this paper is the heterogeneity of the data, as data is distributed non-iid across clients in many real-world settings; in other words, each local client data is not fairly drawn from identical underlying distribution. Since each client will learn from different data distributions, it becomes harder for the model to be trained efficiently, as reported in (McMahan et al., 2017). While theoretical evidence on the convergence of FedAvg with non-iid case has recently been shown in (Li et al., 2020), efficient algorithms suitable for this setting have not yet been developed or systematically examined despite some efforts (Zhao et al., 2018; Hsieh et al., 2020).

In addition to non-iid problem, another important issue is that updating model parameters individually trained by each client is very costly and becomes even heavier as the model complexity increases. Some existing works Smith et al. (2016); Sattler et al. (2019) target this issue to decrease

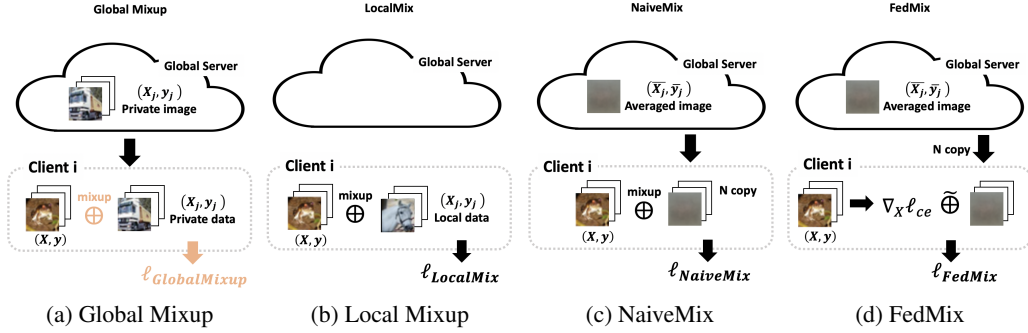

Figure 1: Brief comparisons of Mixup strategies in FL and MAFL. (a) Global Mixup: Raw data is exchanged and directly used for Mixup between local and received data, which violates privacy. (b) Local Mixup: Mixup is only applied within client’s local data. (c) NaiveMix: Under MAFL, Mixup is performed between local data and received *averaged* data. (d) FedMix: Under MAFL, our novel algorithm approximates Global Mixup using input derivatives and *averaged* data.

the amount of communications while maintaining the performance of FedAvg. More practical approach to reduce communication cost is to selectively update individual models at each round, rather than having all clients participate in parameter updates. This partial participation of clients per round hardly affects test performance in ideal iid settings but it can exacerbate the heterogeneity of weight updates across clients and as a result, the issue of non-iid (McMahan et al., 2017).

In order to mitigate the heterogeneity across clients while protecting privacy, we provide a novel yet simple framework, mean augmented federated learning (MAFL), in which each client exchanges the updated model parameters as well as its *mashed* (or averaged) data. MAFL framework allows the trade-off between the amount of meaningful information exchanged and the privacy across clients, depending on several factors such as the number of data instances used in computing the average. We first introduce a naive approach in our framework that simply applies Mixup (Zhang et al., 2018) between local data and averaged external data from other clients to reduce a myopic bias.

Here, we go further in our framework and ask the following seemingly impossible question: can *only averaged data* in our framework that has lost most of the discriminative information, bring the similar effect as a *global Mixup* in which clients directly access others’ private data without considering privacy issues? Toward this, we introduce our second and more important approach in our framework, termed Federated Mixup (FedMix), that simply approximates the loss function of global Mixup via Taylor expansion (it turns out that such approximation only involves the averaged data from other clients!). Figure 1 briefly describes the concept of our methods.

We validate our method on standard benchmark datasets for federated learning, and show its effectiveness against the standard federated learning methods especially for non-iid settings. In particular, we claim that FedMix shows better performance and smaller drop in accuracy with more heterogeneity or fewer clients update per communication round, further increasing difficulty of federated learning.

Our contribution is threefold:

- We propose a simple framework for federated learning that averages and exchanges each local data. Even naive approach in this framework performing Mixup with other clients’ *mashed* data shows performance improvement over existing baselines on several settings.
- We further develop a novel approximation for insecure global Mixup accessing other clients’ local data, and find out that Taylor expansion of global Mixup only involves the averaged data from other clients. Based on this observation, we propose FedMix in our framework approximating global Mixup without accessing others’ raw data.
- We validate **FedMix** on several FL benchmark datasets especially focusing on non-iid data settings where our method significantly outperforms existing baselines while still preserving privacy with minimal increases in communication cost.

## 2 RELATED WORK

**Federated learning** Federated learning was first proposed in Konečný et al. (2016) where the prevalent asynchronous SGD (Dean et al., 2012) is used to update a global model in a distributed fashion. A pioneering work in this field proposed the currently most widely used algorithm, FedAvg (McMahan et al., 2017), which is also the first synchronous algorithm dedicated to federated setting. Shortly after, Li et al. (2018) proposed a variant of FedAvg, named FedProx, where the authors claimed to overcome statistical heterogeneity and increase stability in federated learning. Recent studies attempt to expand federated learning with the aim of providing learning in more diverse and practical environments such as multi-task learning (Smith et al., 2017), generative models (Augenstein et al., 2020), continual learning (Yoon et al., 2020), semi-supervised learning (Jeong et al., 2020), and data with noisy labels (Tuor et al., 2020). Our paper focuses on general federated settings, but it could be considered in such various situations.

However, these algorithms may obtain suboptimal performance when clients participating in FL have non-iid (Zhao et al., 2018; Hsieh et al., 2020) distributions. While the convergence of FedAvg on such settings was initially shown by experiments in McMahan et al. (2017) and later proved in Li et al. (2020), it does not guarantee performance as good as it would have been for iid setting. Existing algorithms that pointed out this issue have major limitations, such as privacy violation by partial global sharing of local data (Zhao et al., 2018) or no indication of improvement over baseline algorithms such as FedAvg (Hsieh et al., 2020). Our method aims to improve performance particularly on these non-iid situations, without compromising privacy.

**Mixup** Mixup (Zhang et al., 2018) is a popular data augmentation technique that generates additional data by linear interpolation between actual data instances. Mixup has been usually applied to image classification tasks and shown to improve test accuracy on various datasets such as CIFAR10 and ImageNet-2012 (Russakovsky et al., 2015), and, on popular architectures such as ResNet (He et al., 2016) and ResNeXt (Xie et al., 2017), for various model complexity. It is also reported in Zhang et al. (2018) that Mixup helps with stability, adversarial robustness (Zhang et al., 2018), calibration, and predictive certainty (Thulasidasan et al., 2019). Mixup is expanding from various angles due to its simplicity and popularity. First, beyond image classification tasks, its effectiveness has been proven in various domains such as image segmentation (Eaton-Rosen et al., 2020), speech recognition (Warden, 2018), and natural language processing (Guo et al., 2019). Also, several extensions such as Manifold Mixup (Verma et al., 2018), which performs Mixup in latent space, or CutMix (Yun et al., 2019), which replaces specific regions with others patches, have been proposed.

In most of the previous studies on federated learning, Mixup was partially (or locally) used as a general data augmentation technique. Some recent studies (Oh et al., 2020; Shin et al., 2020) proposed to send blended data to server using Mixup, but they require sending locally- and linearly-mixed (mostly from two instances) data to server at every round, therefore being susceptible to privacy issues with huge communication costs. Our work properly modifies Mixup under the restrictions of federated learning and mitigates the major challenges of federated learning such as non-iid clients.

## 3 MEAN AUGMENTED FEDERATED LEARNING (MAFL) AND FEDMIX

We now provide our framework exchanging averaged data for federated learning and main method approximating insecure global Mixup under our framework, after briefly introducing the setup.

### 3.1 SETUP AND BACKGROUND

**Federated learning and FedAvg** Federated Averaging (FedAvg) (McMahan et al., 2017) has been the most popular algorithmic framework for federated learning. For every communication round  $t = 0, \dots, T - 1$ , a client  $k \in 1, \dots, N$  selected for local training sends back its model  $w_t^k$  (or only difference to reduce communication cost) to a global server. For every round,  $K$  number of clients are selected to locally update and send model parameters. The server simply averages parameters received, so that the global model  $w_t$  after  $t$  rounds of communications becomes  $w_t = \sum_{k=1}^n p_k w_t^k$  where  $p_k$  is the importance of client  $k$  based on the relative number of data in  $k$  among all selected clients at  $t$ . The updated global model is sent back to clients for the next round, which undergoes the following  $E$  local updates via stochastic gradient descent (SGD):

$\mathbf{w}_{t+1,i+1}^k \leftarrow \mathbf{w}_{t+1,i}^k - \eta_{t+1} \nabla \ell(f(\mathbf{x}_i^k; \mathbf{w}_{t+1,i}^k), y_i^k)$  for  $i = 0, 1, \dots, E - 1$ , batch size  $B$ , and local learning rate  $\eta$ . Here,  $\ell$  is the loss function for learning and  $f(\mathbf{x}; \mathbf{w}_t)$  is the model output for input  $\mathbf{x}$  given model weight  $\mathbf{w}_t$ .

**Mixup** Mixup (Zhang et al., 2018) is a simple data augmentation technique using a linear interpolation between two input-label pairs  $(\mathbf{x}_i, y_i)$  and  $(\mathbf{x}_j, y_j)$  to augment  $\tilde{\mathbf{x}} = \lambda \mathbf{x}_i + (1 - \lambda) \mathbf{x}_j$  and  $\tilde{y} = \lambda y_i + (1 - \lambda) y_j$ . The variable  $\lambda \in [0, 1]$  is a hyperparameter that is chosen from the beta distribution for each training step.

### 3.2 MAFL: MEAN AUGMENTED FEDERATED LEARNING

The most obvious and powerful way for local models to receive information about data from other clients is to simply receive raw individual data. However, under typical federated setting, each client does not have direct access to individual external data due to privacy constraints, leading to overall performance degradation. We propose a federated learning framework that relaxes the limitation of accessing others' raw data and allows a more granular level of privacy depending on applications. In our new framework, termed mean augmented federated learning (MAFL), clients not only exchange model parameters but also its *mashed* (or averaged) data.

In MAFL, only the part that exchanges averaged data of each client has been added to the standard FL paradigm (Algorithm 1). Here, the number of data instances used in computing the average,  $M_k$ , controls the key features of MAFL such as privacy and communication costs. Lower  $M_k$  value results in more relevant information passed over, but only in cost of less secure privacy and larger communication cost. In one extreme of  $M_k = 1$ , raw data is thoroughly exchanged and privacy is not protected at all, which is clearly inappropriate for FL. But, in the other extreme, all data of each client is averaged to ensure a considerable degree of privacy. In addition, it also has an advantage on communication cost; each client sends a set of  $n_k/M_k$  averaged data where  $n_k$  is local data size of client  $k$ . The remaining question is whether it is possible to improve performance even when exchanging information that is averaged from all local data and loses discriminative characteristics.

---

#### Algorithm 1: Mean Augmented Federated Learning (MAFL)

---

**Input:**  $\mathbf{X}_k, \mathbf{Y}_k$  for  $k = 1, \dots, N$   
 $M_k$ : number of data instances used for computing average  $\bar{\mathbf{x}}, \bar{\mathbf{y}}$

Initialize  $\mathbf{w}_0$  for global server

**for**  $t = 0, \dots, T - 1$  **do**

**for** client  $k$  with updated local data **do**  
     Split local data into  $M_k$  sized batches  
     Compute  $\bar{\mathbf{x}}, \bar{\mathbf{y}}$  for each batch  
     Send all  $\bar{\mathbf{x}}, \bar{\mathbf{y}}$  to server  
**end**

**end**  
 $\mathbb{S}_t \leftarrow K$  clients selected at random  
 Send  $\mathbf{w}_t$  to clients  $k \in \mathbb{S}_t$

**if** updated **then**  
     Aggregate all  $\bar{\mathbf{x}}, \bar{\mathbf{y}}$  to  $\mathbf{X}_g, \mathbf{Y}_g$   
     Send  $\mathbf{X}_g, \mathbf{Y}_g$  to clients  $k \in \mathbb{S}_t$   
**end**

**for**  $k \in \mathbb{S}_t$  **do**  
      $\mathbf{w}_{t+1}^k \leftarrow \text{LocalUpdate}(k, \mathbf{w}_t; \mathbf{X}_g, \mathbf{Y}_g)$   
**end**

$\mathbf{w}_{t+1} \leftarrow \frac{1}{K} \sum_{k \in \mathbb{S}_t} p_k \mathbf{w}_{t+1}^k$

**end**

---



---

#### Algorithm 2: FedMix

---

*LocalUpdate* under MAFL (Algorithm 1):

Select an entry  $\mathbf{x}_g, \mathbf{y}_g$  from  $\mathbf{X}_g, \mathbf{Y}_g$   
 $\ell_1 = (1 - \lambda) \ell(f((1 - \lambda) \mathbf{X}; \mathbf{w}), \mathbf{Y})$   
 $\ell_2 = \lambda \ell(f((1 - \lambda) \mathbf{X}; \mathbf{w}), \mathbf{y}_g)$   
 $\ell_3 = \lambda(1 - \lambda) \frac{\partial \ell_1}{\partial \mathbf{x}} \cdot \mathbf{x}_g$   
 (derivative calculated for each of  $\mathbf{x}$  in  $\mathbf{X}$ )  
 $\ell = \ell_1 + \ell_2 + \ell_3$

The most naive way we can consider in our MAFL framework is to directly use the *mashed* data from other clients, just like regular local data. However, since mashed data has a lot less usable

information than local data, we can think of a method of mixing it with local data:

$$\ell_{\text{NaiveMix}} = (1 - \lambda)\ell\left(f\left((1 - \lambda)\mathbf{x}_i + \lambda\bar{\mathbf{x}}_j\right), y_i\right) + \lambda\ell\left(f\left((1 - \lambda)\mathbf{x}_i + \lambda\bar{\mathbf{x}}_j\right), \bar{y}_j\right) \quad (1)$$

where  $(\mathbf{x}_i, y_i)$  is an entry from local data and  $(\bar{\mathbf{x}}_j, \bar{y}_j)$  corresponds to means of (inputs, labels) from other client  $j$ . Note that Eq. (1) can be understood as the generalization of the loss of directly using the meshed data mentioned above in the sense that such loss can be achieved if  $\lambda$  in Eq. (1) is set deterministically to 0 and 1.

In the experimental section, we confirm the effectiveness of MAFL using  $\ell_{\text{NaiveMix}}$ . However, in the next subsection, we will show how to achieve better performance by approximating the global Mixup in a more systematical way in our MAFL framework.

### 3.3 FEDMIX: APPROXIMATING GLOBAL MIXUP VIA INPUT DERIVATIVE

We now provide our main approach in the MAFL framework that aims to approximate the effect of global Mixup only using averaged data from other clients. Consider some client  $i$  with its local data  $(\mathbf{x}_i, y_i)$ . It is not allowed in federated learning, but let us assume that client  $i$  has an access to client  $j$ 's local data  $(\mathbf{x}_j, y_j)$ . Then, client  $i$  would leverage  $(\mathbf{x}_j, y_j)$  to improve the performance of its local model especially in non-iid settings by augmenting additional data via Mixup:

$$\tilde{\mathbf{x}} = (1 - \lambda)\mathbf{x}_i + \lambda\mathbf{x}_j \quad \text{and} \quad \tilde{y} = (1 - \lambda)y_i + \lambda y_j. \quad (2)$$

If Mixup rate  $\lambda$  is 1,  $(\mathbf{x}_j, y_j)$  from client  $j$  is again directly used like a regular local data, and it would be much more efficient than indirect update of local models through the server.

The essence of our method is to approximate the loss function  $\ell(f(\tilde{\mathbf{x}}), \tilde{y})$  for the augmented data from Eq. (2), with Taylor expansion for the first argument  $\tilde{\mathbf{x}}$ . Specifically, we derive the following proposition:

**Proposition 1** *Consider the loss function of the global Mixup modulo the privacy issues,*

$$\ell_{\text{GlobalMixup}}(f(\tilde{\mathbf{x}}), \tilde{y}) = \ell\left(f\left((1 - \lambda)\mathbf{x}_i + \lambda\mathbf{x}_j\right), (1 - \lambda)y_i + \lambda y_j\right) \quad (3)$$

for cross-entropy loss<sup>1</sup>. Suppose that Eq. (3) is approximated by applying Taylor series around the place where  $\lambda \ll 1$ . Then, if we ignore the second order term (i.e.,  $\mathcal{O}(\lambda^2)$ ), we obtain the following approximated loss:

$$\ell_{\text{FedMix}} = (1 - \lambda)\ell\left(f\left((1 - \lambda)\mathbf{x}_i\right), y_i\right) + \lambda\ell\left(f\left((1 - \lambda)\mathbf{x}_i\right), y_j\right) + \lambda(1 - \lambda)\frac{\partial\ell}{\partial\mathbf{x}} \cdot \mathbf{x}_j \quad (4)$$

where the derivative  $\frac{\partial\ell}{\partial\mathbf{x}}$  is evaluated at  $\mathbf{x} = (1 - \lambda)\mathbf{x}_i$  and  $y = y_i$ .

The core value of Proposition 1 gets clearer when mixing up multiple data instances from other clients. Note that the vanilla Mixup is not mixing one specific instance with other data, but performing augmentations among several random selected data. In a non-iid FL environment, we can also expect that the effect will be greater as we create Mixup data by accessing as much private data as possible from other clients. From this point of view, let us assume that client  $i$  has received a set of  $M$  private instances,  $J$ , from client  $j$ . Then, the global Mixup loss in Eq. (3) is

$$\sum_{j \in J} \ell\left(f\left((1 - \lambda)\mathbf{x}_i + \lambda\mathbf{x}_j\right), (1 - \lambda)y_i + \lambda y_j\right),$$

and the approximated FedMix loss in Proposition 1 becomes

$$\begin{aligned} & \sum_{j \in J} (1 - \lambda)\ell\left(f\left((1 - \lambda)\mathbf{x}_i\right), y_i\right) + \lambda\ell\left(f\left((1 - \lambda)\mathbf{x}_i\right), y_j\right) + \lambda(1 - \lambda)\frac{\partial\ell}{\partial\mathbf{x}} \cdot \mathbf{x}_j \\ &= (1 - \lambda)\ell\left(f\left((1 - \lambda)\mathbf{x}_i\right), y_i\right) + \lambda\ell\left(f\left((1 - \lambda)\mathbf{x}_i\right), \bar{y}_j\right) + \lambda(1 - \lambda)\frac{\partial\ell}{\partial\mathbf{x}} \cdot \bar{\mathbf{x}}_j \end{aligned}$$

where we utilize the linearity of  $\ell_{\text{FedMix}}$  in terms of  $\mathbf{x}_j$  and  $y_j$ , and  $\bar{\mathbf{x}}_j$  and  $\bar{y}_j$  correspond to mean of  $M$  inputs and labels in  $J$ , respectively. Details of FedMix is provided in Algorithm 2.

<sup>1</sup>Throughout the paper, we implicitly assume the classification tasks. For regression tasks, we can consider the squared loss function, and the proposition still holds.

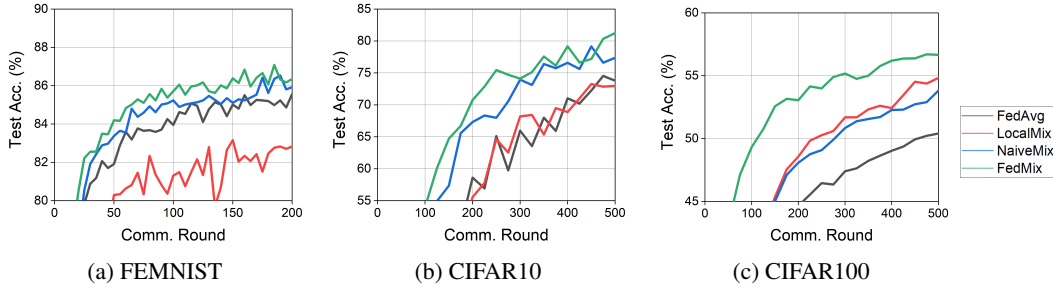

Figure 2: Learning curves for various algorithms on benchmark datasets. Learning curves correspond to results in Table 1. (For simplicity, we only show key algorithms to compare.)

Table 1: Test accuracy after (target rounds) and number of rounds to reach (target test accuracy) on various datasets. Algorithms in conjunction with FedProx are compared separately (bottom). MAFL-based algorithms are marked in bold.

| Algorithm                 | FEMNIST             |              | CIFAR10             |              | CIFAR100            |              |
|---------------------------|---------------------|--------------|---------------------|--------------|---------------------|--------------|
|                           | test acc. (%) (200) | rounds (80%) | test acc. (%) (500) | rounds (70%) | test acc. (%) (500) | rounds (40%) |
| Global Mixup              | 88.2                | 8            | 88.2                | 85           | 61.4                | 54           |
| FedAvg                    | 85.3                | 26           | 73.8                | 283          | 50.4                | 101          |
| LocalMix                  | 82.8                | 28           | 73.0                | 267          | 54.8                | 91           |
| <b>NaiveMix</b>           | 85.9                | 23           | 77.4                | 198          | 53.8                | 85           |
| <b>FedMix</b>             | <b>86.5</b>         | <b>18</b>    | <b>81.2</b>         | <b>162</b>   | <b>56.7</b>         | <b>34</b>    |
| FedProx                   | 84.6                | 29           | 77.3                | 266          | 51.2                | 79           |
| FedProx + LocalMix        | 84.1                | 39           | 74.1                | 314          | 54.0                | 90           |
| FedProx + <b>NaiveMix</b> | 85.7                | 37           | 76.7                | 230          | 53.1                | 74           |
| FedProx + <b>FedMix</b>   | <b>86.0</b>         | 32           | <b>78.9</b>         | <b>223</b>   | <b>54.5</b>         | <b>63</b>    |

## 4 EXPERIMENTS

We test our result on various benchmark datasets with NaiveMix (direct mixup between local data and averaged data) and FedMix, then compare the results with FedAvg (McMahan et al., 2017) and FedProx (Li et al., 2018), as well as other baseline Mixup scenarios. We create a highly non-iid environment to show our methods excel in such situations.

### 4.1 EXPERIMENTAL SETUP

**Dataset** We implement the typical federated setting where clients have their own local data and one centralized server that receives and sends information from/to the clients. We utilize a large number of clients and only utilize partial set of clients chosen each round to locally update. We used three popular image classification benchmark datasets: FEMNIST (Caldas et al., 2019), CIFAR10, and CIFAR100, as well as a popular natural language processing benchmark dataset, Shakespeare. See Appendix B for more details about dataset, models, and hyperparameters used.

**Algorithms** We study the performance of FedMix and NaiveMix and compare with FedAvg and FedProx. We also compare our method against FedAvg with Mixup within local data (labeled LocalMix; see Figure 1(b)), to show whether Mixup within local data is sufficient to allow the model to perform well on external data. To show the effectiveness of FedMix, we also compare our method to the case where we perform direct Mixup with external data (and thus violating privacy, labeled Global Mixup; see Figure 1(a)).

### 4.2 PERFORMANCE OF FEDMIX AND NAIVEMIX ON NON-IID FEDERATED SETTINGS

We compare the learning curves of each method under the same federated settings, in terms of number of communication rounds conducted. Comparing MAFL-based algorithms, NaiveMix shows slight performance increases than FedAvg, FedProx, and Localmix, while FedMix outperforms and



Table 2: Test accuracy after 50 rounds on Shakespeare dataset.

| Algorithm     | FedAvg | FedProx | LocalMix | NaiveMix    | FedMix      |
|---------------|--------|---------|----------|-------------|-------------|
| Test Acc. (%) | 54.7   | 54.4    | 53.7     | <b>56.9</b> | <b>56.9</b> |

Table 3: Test accuracy on CIFAR10, under varying number of clients ( $N$ ). Number of samples per client is kept constant.

| # of Clients( $N$ ) | 20          | 40          | 60          |
|---------------------|-------------|-------------|-------------|
| FedAvg              | 65.8        | 73.4        | 73.8        |
| LocalMix            | 46.9        | 71.4        | 73.0        |
| NaiveMix            | 62.2        | 75.1        | 77.4        |
| FedMix              | <b>68.5</b> | <b>76.4</b> | <b>81.2</b> |

Table 4: Test accuracy on CIFAR10, under varying number of local data per client. Number of clients ( $N$ ) is kept constant. Number of data is indicated in percentage of the case where all 50,000 data are used.

| Local data (%) | 20          | 50          | 100         |
|----------------|-------------|-------------|-------------|
| FedAvg         | 61.8        | 74.7        | 73.8        |
| LocalMix       | 43.7        | 60.3        | 73.0        |
| NaiveMix       | 51.5        | 69.6        | 77.4        |
| FedMix         | <b>65.2</b> | <b>77.8</b> | <b>81.2</b> |

shows faster convergence than all of FedAvg, FedProx, Localmix and NaiveMix for all datasets tested as in Figure 2.

While NaiveMix and FedMix is already superior to FedProx, they are parallel to FedProx modification and can be applied in conjunction with FedProx. We compare performances across FedProx variants of various Mixup algorithms in Table 1. FedMix outperforms vanilla FedProx for various datasets, although they do fall short of default version of FedMix used for the main experiment.

To confirm whether received information is properly incorporated, we compare FedMix with possible Mixup scenarios under MAFL. We show the results in Appendix D.

While Mixup is usually performed for image classification tasks, it could be applied for language models. For language datasets, since Mixup cannot be performed on input, we perform Mixup on embeddings (for a detailed explanation of Mixup between hidden states, see Appendix E). When tested on Shakespeare dataset, FedMix and NaiveMix both show better performance than baseline algorithms (Table 2).

We also claim that FedMix is superior compared to other methods under various settings, in terms of varying number of clients ( $N$ ) and varying number of local data per clients. We observe superior performance of FedMix compared to other algorithms for all settings (see Tables 3 and 4). We also vary the number of local epochs ( $E$ ) between global updates, and still observe that FedMix outperforms other methods (see Appendix F).

**FedMix compared to global Mixup with fixed mixup ratio** Since FedMix approximates loss function of global Mixup for fixed value of  $\lambda \ll 1$ , we can evaluate the efficiency of approximation by comparing between FedMix and a global Mixup scenario with fixed  $\lambda$  value. Table 5 shows varying performance between global Mixup and FedMix under various values of  $\lambda$ . As  $\lambda$  increases, Mixup data reflects more of the features of external data, resulting in better performance in case of global Mixup. However, this also results in our approximation being much less accurate, and we indeed observe performance of FedMix decreasing instead. The result shows that the hyperparameter  $\lambda$  should be chosen to balance between better Mixup and better approximation. However, it seems that high  $\lambda$  results in significant decrease in both methods, probably due to external data (which is out-of-distribution for local distribution) being overrepresented during local update.

Table 5: Test accuracy on CIFAR10, under varying mixup ratio  $\lambda$ .

| $\lambda$    | 0.05 | 0.1  | 0.2  | 0.5  |
|--------------|------|------|------|------|
| Global Mixup | 79.4 | 80.4 | 81.1 | 63.6 |
| FedMix       | 81.2 | 80.5 | 77.7 | 67.1 |

|                | $M_k$    | 5           | 10          | 20          | 50          | All(=833)   |
|----------------|----------|-------------|-------------|-------------|-------------|-------------|
| <b>FEMNIST</b> | NaiveMix | 85.7        | <b>86.3</b> | 86.2        | 86.1        | 85.9        |
|                | FedMix   | <b>86.0</b> | 85.7        | <b>86.4</b> | <b>86.2</b> | <b>86.5</b> |
| <b>CIFAR10</b> | NaiveMix | 79.6        | 77.9        | 79.1        | 77.1        | 77.4        |
|                | FedMix   | <b>81.4</b> | <b>79.9</b> | <b>80.4</b> | <b>79.5</b> | <b>80.5</b> |

Figure 3: Performance of MAFL-based algorithms for various  $M_k$  values (left), and samples of averaged images from EMNIST/CIFAR10 for various  $M_k$  values (right).

Table 6: Test accuracy after 500 rounds on CIFAR10, under varying number of classes per client.

| Algorithm | class/client |             |             |             |
|-----------|--------------|-------------|-------------|-------------|
|           | 2            | 3           | 5           | 10 (iid)    |
| FedAvg    | 73.8         | 84.2        | 86.8        | 89.3        |
| Localmix  | 73           | 83.3        | 86.4        | 89.1        |
| NaiveMix  | 77.4         | 84.5        | 87.7        | <b>89.4</b> |
| FedMix    | <b>81.2</b>  | <b>85.1</b> | <b>87.9</b> | 89.1        |

Table 7: Test accuracy after 500 rounds on CIFAR10, under varying number of clients trained per communication round.

| Algorithm | $K/N$       |             |             |             |             |
|-----------|-------------|-------------|-------------|-------------|-------------|
|           | 0.1         | 0.15        | 0.25        | 0.5         | 1.0         |
| FedAvg    | 63.3        | 73.2        | 73.8        | 76.3        | 83.1        |
| Localmix  | 64.7        | 64.5        | 73          | 77.9        | 79.8        |
| NaiveMix  | 73.6        | 74.7        | 77.4        | 81.4        | 83.5        |
| FedMix    | <b>74.7</b> | <b>76.9</b> | <b>80.5</b> | <b>82.1</b> | <b>84.3</b> |

**Effect of  $M_k$  to compute mean** In our algorithm, we chose to calculate  $\mathbf{X}_g, \mathbf{Y}_g$  with all local data for each client. To observe a potential effect of  $M_k$ , we varied  $M_k$  used to compute the averaged data that is sent from other clients. Inevitably, reducing  $M_k$  will result in  $\mathbf{X}_g, \mathbf{Y}_g$  having much more rows, imposing additional computation burden and less preservation of privacy. In general, for both FEMNIST and CIFAR10, there is only small performance decline as privacy is enhanced, as can be seen in Figure 3. We show that using all local data to calculate each mean is sufficient to both preserve privacy and still have good performance.

**Mixup between hidden states** Manifold Mixup (Verma et al., 2018) was proposed to show improvements over input Mixup (Zhang et al., 2018) in various image classification tasks such as CIFAR10, CIFAR100, and SVHN. We discuss the possibilities and implications of applying Mixup between hidden states in Appendix E. In summary, we show that variants of using hidden states do not show meaningful advances over FedMix using input Mixup, suggesting that in general, it is relatively inefficient since it imposes additional communication burden.

**Effect of non-iid-ness and client participation** We claim that our method is efficient when faced with non-iid federated settings. For example, our setting of CIFAR10 having only data from 2 classes per client is very non-iid, as in average a pair of clients share only roughly 20% of data distribution. We test settings for CIFAR10 where clients have data from greater number of classes, and while there is little difference for iid (10 class/client) setting, we observe that FedMix outperform other methods and suffer less from increased heterogeneity from highly non-iid settings (Table 6). In addition, we also observe less decline and better performance for MAFL-based algorithms, FedMix in particular, as we train less number of clients per round, reducing communication burden in cost of performance (Table 7).

## 5 CONCLUSION

We proposed MAFL, a novel framework that involves exchange of *averaged* data, to gain relevant information while still ensuring privacy. Under the new framework, we first suggested NaiveMix, which is a naive implementation of Mixup between local data and received data. Most importantly, we proposed FedMix, which provides approximation of global Mixup loss only using averaged data. MAFL, and FedMix in particular, showed improved performance over existing algorithms in various benchmarks, particularly in non-iid environments where each client has data distributed heterogeneously. While our method is very effective and still preserving privacy, future work needs to be done to deal with various non-iid environments, desirably with better privacy and beyond image classification tasks.



## REFERENCES

- Sean Augenstein, H. Brendan McMahan, Daniel Ramage, Swaroop Ramaswamy, Peter Kairouz, Mingqing Chen, Rajiv Mathews, and Blaise Agüera y Arcas. Generative models for effective ml on private, decentralized datasets. *International Conference on Learning Representations (ICLR)*, 2020.
- Sebastian Caldas, Sai Meher Karthik Duddu, Peter Wu, Tian Li, Jakub Konečný, H. Brendan McMahan, Virginia Smith, and Ameet Talwalkar. Leaf: A benchmark for federated settings. *International Conference on Machine Learning (ICML) Workshop on Federated Learning for Data Privacy and Confidentiality*, 2019.
- Olivier Chapelle, Jason Weston, Léon Bottou, and Vladimir Vapnik. Vicinal risk minimization. *Conference on Neural Information Processing Systems (NIPS)*, 2000.
- Gregory Cohen, Saeed Afshar, Jonathan Tapson, and André van Schaik. Emnist: an extension of mnist to handwritten letters. *International Joint Conference on Neural Networks (IJCNN)*, 2017.
- Jeffrey Dean, Greg Corrado, Rajat Monga, Kai Chen, Matthieu Devin, Mark Mao, Marc’auelio Ranzato, Andrew Senior, Paul Tucker, Ke Yang, Quoc V. Le, and Andrew Y. Ng. Large scale distributed deep networks. *Conference on Neural Information Processing Systems (NIPS)*, 2012.
- Z. Eaton-Rosen, Felix J. S. Bragman, Sébastien Ourselin, and M. Cardoso. Improving data augmentation for medical image segmentation. *Conference on Medical Imaging with Deep Learning (MIDL)*, 2020.
- Matt Fredrikson, Somesh Jha, and Thomas Ristenpart. Model inversion attacks that exploit confidence information and basic countermeasures. *Proceedings of the 22nd ACM SIGSAC Conference on Computer and Communications Security*, 2015.
- Hongyu Guo, Yongyi Mao, and Richong Zhang. Augmenting data with mixup for sentence classification: An empirical study. *CoRR*, abs/1905.08941, 2019.
- Kaiming He, Xiangyu Zhang, Shaoqing Ren, and Jian Sun. Deep residual learning for image recognition. *Conference on Computer Vision and Pattern Recognition (CVPR)*, 2016.
- Kevin Hsieh, Amar Phanishayee, Onur Mutlu, and Phillip B. Gibbons. The non-iid data quagmire of decentralized machine learning. *International Conference on Machine Learning (ICML)*, 2020.
- Wonyong Jeong, Jaehong Yoon, Eunho Yang, and Sung Ju Hwang. Federated semi-supervised learning with inter-client consistency. *International Workshop on Federated Learning for User Privacy and Data Confidentiality in Conjunction with ICML 2020 (FL-ICML’20)*, 2020.
- Jakub Konečný, H. Brendan McMahan, Felix X. Yu, Peter Richtárik, Ananda Theertha Suresh, and Dave Bacon. Federated learning: Strategies for improving communication efficiency. *Conference on Neural Information Processing Systems (NIPS) Workshop on Private Multi-Party Machine Learning*, 2016.
- Yann Lecun, Léon Bottou, Yoshua Bengio, and Patrick Haffner. Gradient-based learning applied to document recognition. *Proceedings of the IEEE*, 1998.
- Tian Li, Anit Kumar Sahu, Manzil Zaheer, Maziar Sanjabi, Ameet Talwalkar, and Virginia Smith. Federated optimization in heterogeneous networks. *International Conference on Machine Learning (ICML) Workshop on Adaptive & Multitask Learning*, 2018.
- Xiang Li, Kaixuan Huang, Wenhao Yang, Shusen Wang, and Zhihua Zhang. On the convergence of fedavg on non-iid data. *International Conference on Learning Representations (ICLR)*, 2020.
- H. Brendan McMahan, Eider Moore, Daniel Ramage, Seth Hampson, and Blaise Agüera y Arcas. Communication-efficient learning of deep networks from decentralized data. *International Conference on Artificial Intelligence and Statistics (AISTATS)*, 2017.
- Mehryar Mohri, Gary Sivek, and Ananda Theertha Suresh. Agnostic federated learning. *International Conference on Machine Learning (ICML)*, 2019.

- Seungeun Oh, Jihong Park, Eunjeong Jeong, Hyesung Kim, Mehdi Bennis, and Seong-Lyun Kim. Mix2fld: Downlink federated learning after uplink federated distillation with two-way mixup. *IEEE Communication Letters*, 2020.
- Olga Russakovsky, Jia Deng, Hao Su, Jonathan Krause, Sanjeev Satheesh, Sean Ma, Zhiheng Huang, Andrej Karpathy, Aditya Khosla, Michael Bernstein, Alexander C. Berg, and Li Fei-Fei. Imagenet large scale visual recognition challenge. *International Journal of Computer Vision (IJCV)*, 115(3):211–252, 2015.
- Felix Sattler, Simon Wiedemann, Klaus-Robert Müller, and Wojciech Samek. Robust and communication-efficient federated learning from non-iid data. *IEEE Transactions on Neural Networks and Learning Systems*, 2019.
- MyungJae Shin, Chihoon Hwang, Joongheon Kim, Jihong Park, Mehdi Bennis, and Seong-Lyun Kim. Xor mixup: Privacy-preserving data augmentation for one-shot federated learning. *International Workshop on Federated Learning for User Privacy and Data Confidentiality in Conjunction with ICML 2020 (FL-ICML’20)*, 2020.
- Karen Simonyan and Andrew Zisserman. Very deep convolutional networks for large-scale image recognition. *International Conference on Learning Representations (ICLR)*, 2015.
- Virginia Smith, Simone Forte, Chenxin Ma, Martin Takac, Michael I. Jordan, and Martin Jaggi. Cocoa: A general framework for communication-efficient distributed optimization. *Journal of Machine Learning Research (JMLR)*, 2016.
- Virginia Smith, Chao-Kai Chiang, Maziar Sanjabi, and Ameet Talwalkar. Federated multi-task learning. *Conference on Neural Information Processing Systems (NIPS)*, 2017.
- Sunil Thulasidasan, Gopinath Chennupati, Jeff Bilmes, Tanmoy Bhattacharya, and Sarah Michalak. On mixup training: Improved calibration and predictive uncertainty for deep neural networks. *Conference on Neural Information Processing Systems (NIPS)*, 2019.
- Tiffany Tuor, Shiqiang Wang, Bong Jun Ko, Changchang Liu, and Kin K. Leung. Overcoming noisy and irrelevant data in federated learning. *International Conference on Pattern Recognition (ICPR)*, 2020.
- Vikas Verma, Alex Lamb, Christopher Beckham, Amir Najafi, Ioannis Mitliagkas, Aaron Courville, David Lopez-Paz, and Yoshua Bengio. Manifold mixup: Better representations by interpolating hidden states. *International Conference on Machine Learning (ICML)*, 2018.
- Hongyi Wang, Mikhail Yurochkin, Yuekai Sun, Dimitris Papailiopoulos, and Yasaman Khazaeni. Federated learning with matched averaging. *International Conference on Learning Representations (ICLR)*, 2020.
- Pete Warden. Speech commands: A dataset for limited-vocabulary speech recognition. *ArXiv*, abs/1804.03209, 2018.
- Saining Xie, Ross Girshick, Piotr Dollár, Zhuowen Tu, and Kaiming He. Aggregated residual transformations for deep neural networks. *Conference on Computer Vision and Pattern Recognition (CVPR)*, 2017.
- Jaehong Yoon, Wonyong Jeong, Giwoong Lee, Eunho Yang, and Sung Ju Hwang. Federated continual learning with adaptive parameter communication. *ArXiv*, abs/2003.03196, 2020.
- Sangdo Yun, Dongyoon Han, Seong Joon Oh, Sanghyuk Chun, Junsuk Choe, and Youngjoon Yoo. Cutmix: Regularization strategy to train strong classifiers with localizable features. *International Conference on Computer Vision (ICCV)*, 2019.
- Mikhail Yurochkin, Mayank Agarwal, Soumya Ghosh, Kristjan Greenewald, Nghia Hoang, and Yasaman Khazaeni. Bayesian nonparametric federated learning of neural networks. *International Conference on Machine Learning (ICML)*, 2019.
- Hongyi Zhang, Moustapha Cisse, Yann N. Dauphin, and David Lopez-Paz. mixup: Beyond empirical risk minimization. *International Conference on Learning Representations (ICLR)*, 2018.

Yue Zhao, Meng Li, Liangzhen Lai, Naveen Suda, Damon Cavin, and Vikas Chandra. Federated learning with non-iid data. *arXiv preprint arXiv:1806.00582*, 2018.

## A ALGORITHMS

We present a brief depiction of FedAvg in Algorithm 3.

---

**Algorithm 3:** FedAvg

---

|                                                                                                                                                                                                                                                                                                                                                                                                                                                                                                      |                                                                                                                                                                                                                                                                                                            |
|------------------------------------------------------------------------------------------------------------------------------------------------------------------------------------------------------------------------------------------------------------------------------------------------------------------------------------------------------------------------------------------------------------------------------------------------------------------------------------------------------|------------------------------------------------------------------------------------------------------------------------------------------------------------------------------------------------------------------------------------------------------------------------------------------------------------|
| <b>Input:</b> $N, T, K, E, B, p_k, \mathbb{D}_k, k = 1, \dots, N, \eta_t, t = 0, \dots, T - 1$<br>Initialize $w_0$ for global server<br><b>for</b> $t = 0, \dots, T - 1$ <b>do</b><br>$\mathbb{S}_t \leftarrow K$ clients selected at random<br>Send $w_t$ to clients $k \in \mathbb{S}_t$<br><b>for</b> $k \in \mathbb{S}_t$ <b>do</b><br>$w_{t+1}^k \leftarrow \text{LocalUpdate}(k, w_t)$<br><b>end</b><br>$w_{t+1} \leftarrow \frac{1}{K} \sum_{k \in \mathbb{S}_t} p_k w_{t+1}^k$<br><b>end</b> | $\text{LocalUpdate}(k, w_t)$ :<br>$w \leftarrow w_t$<br><b>for</b> $e = 0, \dots, E - 1$ <b>do</b><br>Split $\mathbb{D}_k$ into batches of size $B$<br><b>for</b> $\text{batch}(X, Y)$ <b>do</b><br>$w \leftarrow w - \eta_{t+1} \nabla \ell(f(X; w), Y)$<br><b>end</b><br><b>end</b><br><b>return</b> $w$ |
|------------------------------------------------------------------------------------------------------------------------------------------------------------------------------------------------------------------------------------------------------------------------------------------------------------------------------------------------------------------------------------------------------------------------------------------------------------------------------------------------------|------------------------------------------------------------------------------------------------------------------------------------------------------------------------------------------------------------------------------------------------------------------------------------------------------------|

---

## B EXPERIMENTAL DETAILS

**FEMNIST** FEMNIST is EMNIST (Cohen et al., 2017), a handwritten MNIST dataset, organized into federated setting, as in Caldas et al. (2019). EMNIST is very similar to MNIST, but has several differences. It includes all 26 capital and small letters of alphabet as classes along with numbers, making it 62 classes in total to classify. Also, each image contains information of the writer of the letter. In a realistic non-iid setting, each client has local data consists of only one writer, which is about 200 to 300 samples per client in average, with differing number of samples. We use  $N = 100$  clients and trained only  $K = 10$  clients per communication round.

We used LeNet-5 (Lecun et al., 1998) architecture for client training. LeNet is consisted of 2 conv layers followed by 2x2 maxpool layer then 3 fc layers. We used 5x5 conv layers with 6 and 16 channels. Following fc layers have exactly the same hidden dimension of original LeNet-5 model.

**CIFAR10 and CIFAR100** CIFAR10 and CIFAR100 are very popular and simple image classification datasets for federated setting. Both contain 50,000 training data and 10,000 test data. We split the data into each client,  $N = 60$  in case of CIFAR10 and  $N = 100$  in case of CIFAR100. To create an artificial non-iid environment, we allocate data such that each client only has data from 2 (20 for CIFAR100) randomly chosen classes. We use a modified version of VGG architecture (Simonyan & Zisserman, 2015), so that it has 6 convolutional layers (more details in Appendix B). We train only  $K = 15$  clients per round for CIFAR10 and  $K = 10$  for CIFAR100. No validation data was split and we used all training data for local training.

We used modified version of VGG architecture (Simonyan & Zisserman, 2015). Modified VGGnet is consisted of 6 convolutional layers with 3 max pooling layers. 3x3 conv layers are stacked and 2x2 maxpool layer is stacked after every 2 conv layers. Conv layers have channel sizes of 32, 64, 128, 128, 256, 256. Then 3 fc layers are stacked with hidden dimension 512. We use Dropout layer three times with probability 0.1 after the second, third maxpool layers and before the last fc layer. We remove all batch normalization layers since it is reported that they hurt federated learning performance (Hsieh et al., 2020).

**Shakespeare** We use dataset from *The Complete Works of William Shakespeare*, which is a popular dataset for next-character prediction task. We partition the dataset so that each client has conversations of one speaking role, as in Caldas et al. (2019), which naturally results in a heterogeneous setting, as in FEMNIST. We use  $N = K = 60$ , each with different number of data (minimum is 200). Since input-level Mixup cannot be performed for discrete character labels, we performed Mixup on the embedding layer. Additional concerns for this variation is considered at Appendix E.

We used 2-layer LSTM, both with hidden dimension of 256. The recurrent network is followed by an embedding layer. The output of LSTM is passed to a fully-connected layer, with softmax output of one node per character. There are 84 characters used in the dataset.

Table 8: Hyperparameter settings for each dataset.

| dataset                       | FEMNIST | CIFAR10 | CIFAR100 | Shakespeare |
|-------------------------------|---------|---------|----------|-------------|
| local epochs ( $E$ )          | 10      | 2       | 10       | 2           |
| local batch size              | 10      | 10      | 10       | 10          |
| class per clients             | -       | 2       | 20       | -           |
| fraction of Clients ( $K/N$ ) | 0.1     | 0.25    | 0.1      | 1           |
| total dataset classes         | 62      | 10      | 100      | 84          |
| $\lambda$ (for NaiveMix)      | 0.2     | 0.1     | 0.1      | 0.1         |
| $\lambda$ (for FedMix)        | 0.2     | 0.05    | 0.1      | 0.1         |
| $\mu$ (for FedProx)           | 0.1     | 0.1     | 0.01     | 0.001       |

Local clients are trained by SGD optimizer with learning rate 0.01 and learning decay rate per round 0.999. We set local batch size as 10 for training. Specific hyperparameter setting for each dataset is explained in following Table 8. Throughout the experiment,  $M_k$  is fixed to local client’s dataset size. Changes in these parameters are indicated, if made, are stated for all experiments. Note that we use a fixed small value of  $\lambda$  for MAFL-based algorithms to show superior performance.

## C PROOF OF PROPOSITION 1

We demonstrate mathematical proof of Proposition 1 for FedMix.

Starting from Eq. (3), since the loss function is linear in  $y$  for cross-entropy loss  $\ell^2$ , we have

$$\ell(f(\tilde{\mathbf{x}}), \tilde{y}) = (1 - \lambda)\ell(f((1 - \lambda)\mathbf{x}_i + \lambda\mathbf{x}_j), y_i) + \lambda\ell(f((1 - \lambda)\mathbf{x}_i + \lambda\mathbf{x}_j), y_j). \quad (5)$$

Unlike the original paper, if we assume  $\lambda \ll 1$ , we can treat this loss as objective loss function for vicinal risk minimization (VRM). Under this assumption, each term in Eq. (5) can be approximated by independent Taylor expansion on the first and second argument of  $\ell$ , so that we have

$$\begin{aligned} & (1 - \lambda)\ell(f((1 - \lambda)\mathbf{x}_i), y_i) + (1 - \lambda) \times \left. \frac{\partial \ell}{\partial \mathbf{x}} \right|_{(1 - \lambda)\mathbf{x}_i, y_i} \cdot (\lambda\mathbf{x}_j) \\ & + \lambda\ell(f((1 - \lambda)\mathbf{x}_i), y_j) + \lambda \times \left. \frac{\partial \ell}{\partial \mathbf{x}} \right|_{(1 - \lambda)\mathbf{x}_i, y_j} \cdot (\lambda\mathbf{x}_j). \end{aligned} \quad (6)$$

Since  $\lambda \ll 1$ , we can ignore the last term in the second row of Eq. (6), which is  $\mathcal{O}(\lambda^2)$ . We simplify this equation and switch the second term in the first row and the first term in the second row, to finally obtain

$$\ell(f(\tilde{\mathbf{x}}), \tilde{y}) \approx (1 - \lambda)\ell(f((1 - \lambda)\mathbf{x}_i), y_i) + \lambda\ell(f((1 - \lambda)\mathbf{x}_i), y_j) + \lambda(1 - \lambda) \frac{\partial \ell}{\partial \mathbf{x}} \cdot \mathbf{x}_j. \quad (7)$$

The derivative  $\frac{\partial \ell}{\partial \mathbf{x}}$  is calculated at  $\mathbf{x} = (1 - \lambda)\mathbf{x}_i$  and  $y = y_i$ .

## D COMPARISON OF FEDMIX WITH BASELINE MIXUP SCENARIOS

Since our MAFL-based algorithms could be considered as VRM, it could be considered as a data augmentation (Chapelle et al., 2000). Thus, it is important to confirm that increased performance from MAFL not only comes from data augmentation but also from relevant information received from other clients. To check whether this is true, we compare FedMix with algorithms where we use either *randomly generated noises* as averaged data for Mixup (labeled Mixup w/ random noise) and where we use only *locally averaged* data for Mixup (labeled Mixup w/ local means).

In Table 9, we observe that if averaged data for MAFL is substituted for randomly generated noise or locally generated images, it does not show the level of performance FedMix is able to show. Thus, we claim that FedMix properly incorporates relevant information received.

<sup>2</sup>We implicitly assume the classification tasks. For regression tasks, we can consider the squared loss function and use the equivalent loss that is linear in  $y$

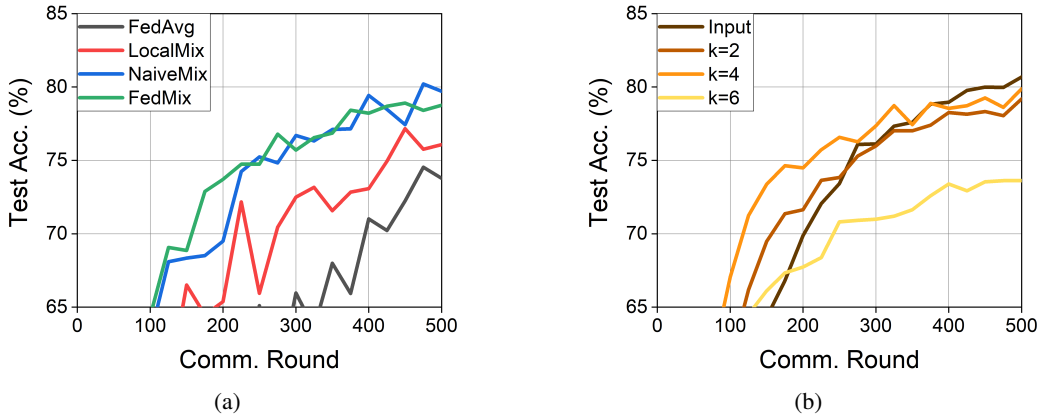

Figure 4: Results for variants of Mixup algorithms for Mixup between hidden states. (a) Learning curves for various algorithms with hidden representation Mixup after  $k = 2$  layers. (b) Learning curves for FedMix when Mixup is applied after different numbers of layers.

## E VARIANT OF FEDMIX AND NAIVEMIX WITH MIXUP BETWEEN HIDDEN STATES

While input Mixup methods promise significant enhancements, one can expect similar performance from hidden state Mixup, originally proposed by Verma et al. (2018). The authors of this work suggest that Manifold Mixup demonstrates similar, if not greater, advantage in terms of performance and adversarial robustness. We can think of variants of FedMix and NaiveMix that implement hidden state Mixup, and test if this variant outperforms vanilla methods based on input Mixup.

Although the original paper proposed randomizing the layer  $k$  just before hidden states that undergo Mixup for each batch, we propose setting this layer  $k$  constant. This is to reduce communication cost significantly, since selecting randomized layer for Mixup will require other clients having to send multiple hidden states (which usually have large dimensions), further imposing communication burden.

Another change is that while original Manifold Mixup (Verma et al., 2018) suggests backpropagating the entire computational graph through the whole network, including the encoder (part of model projecting input to designated hidden representation) and the decoder (rest of the model projecting hidden representation to output). Such thing is impossible to do in typical federated setting, since the computational graph to calculate hidden representation of local data and the graph to calculate hidden representation of other clients' data is separated, and they cannot be updated simultaneously through local update (doing so requires communicating encoder weights across clients every local update, which is highly inefficient in terms of communication). Thus, during Mixup between hidden representations, only the decoder weights can be updated, since only updating encoder of the selected local client will desynchronize encoder weight values for calculating hidden states of local data from those for calculating hidden states of other clients' data every local update, so that the model does not learn properly.

Table 9: Test accuracy after (target rounds) and number of rounds to reach (target test accuracy) on various datasets. We compare FedMix with baseline Mixup algorithms.

| Algorithm             | FEMNIST             |              | CIFAR10             |              | CIFAR100            |              |
|-----------------------|---------------------|--------------|---------------------|--------------|---------------------|--------------|
|                       | test acc. (%) (200) | rounds (80%) | test acc. (%) (500) | rounds (70%) | test acc. (%) (500) | rounds (40%) |
| <b>NaiveMix</b>       | 85.9                | 23           | 77.4                | 198          | 53.8                | 85           |
| Mixup w/ random noise | 86.1                | 23           | 77.9                | 201          | 51.2                | 105          |
| Mixup w/ local means  | 85.5                | 21           | 73.5                | 233          | 51.0                | 87           |
| <b>FedMix</b>         | <b>86.5</b>         | <b>18</b>    | <b>81.2</b>         | <b>162</b>   | <b>56.7</b>         | <b>34</b>    |



Table 10: Test accuracy after 500 rounds on CIFAR10, under varying local epochs ( $E$ ).

| # of Local Epochs ( $E$ ) | 1           | 2           | 5           | 10          |
|---------------------------|-------------|-------------|-------------|-------------|
| FedAvg                    | 74.4        | 73.8        | 80.7        | 78.9        |
| LocalMix                  | 63.7        | 73.0        | 74.7        | 80.0        |
| NaiveMix                  | 72.0        | 77.4        | 81.0        | <b>82.6</b> |
| FedMix                    | <b>75.8</b> | <b>81.2</b> | <b>83.0</b> | 82.5        |

To compensate for this downside, we propose performing vanilla SGD updates without Mixup after Manifold Mixup SGD (which updates weights only in decoder). The vanilla updates will have both local encoder and decoder weights to be updated, thus driving the model to have better hidden representations for Mixup. However, this difference not only imposes additional computation cost, but also does not guarantee that it will show better performance compared to input Mixup methods.

While utilizing hidden representations from other clients sound like a safe idea, it does not ensure data privacy, primarily because the updating client has knowledge of the exact encoder weight values used to calculate hidden states received, and based on our modification, the received hidden states are treated as constants during Mixup. Model inversion attacks (Fredrikson et al., 2015) have been suggested to recover input images from hidden states or outputs, with access to weight values. Thus, direct Mixup between hidden states does not guarantee data privacy. Variant of FedMix and NaiveMix can be applied during decoder training phase, so that privacy is ensured while we successfully approximate Mixup.

The performance of proposed algorithms is shown in Figure 4 on CIFAR10 (same settings with main experiment for dataset, model, and training is used; see Appendix B). Comparison between methods in Figure 4(a) shows that while variants of FedMix and NaiveMix show improved performance over existing methods, they still do not outperform our method based on input Mixup (compare with dotted line). Meanwhile, comparison between using different layers for Mixup is shown in Figure 4(b). It is shown that  $k = 4$  has fastest learning curve but converges similarly to case of  $k = 2$ , both being slightly outperformed by case of input Mixup.

Considering additional computation burden required to communicate hidden states (which often have larger dimensions than raw input) and necessity to communicate the hidden states every communication round (since hidden representations change with encoder weights), we propose that FedMix using input Mixup is superior, and use this method for our main analyses.

## F EFFECT OF LOCAL EPOCHS

Previous works (McMahan et al., 2017; Caldas et al., 2019) show that number of local epochs,  $E$ , affects federated learning performance. We tested the effect of  $E$  on CIFAR10. In general, we showed that test performance increases as  $E$  increases. In addition, we observed that under various values of  $E$ , FedMix shows the best performance compared to other algorithms (see Table 10), being a close second after NaiveMix for  $E = 10$ . MAFL-based algorithms outperform existing algorithms for all values of  $E$  tested.
